# Supplementary material
Source: publisher site journal article supplement (https://www.dovepress.com/article/307546)

Supplement Figure 1: Five representative images of patients with different circulation tumor cell (CTC) subpopulations were listed, based on the RNAISH of mesenchymal (Vimentin and Twist, green fluorescence) and epithelial (EpCAM and CK8/18/19, red fluorescence) markers. According to the immunofluorescence images, we classified CTCs into three subgroups, including A. epithelial CTCs (EpCAM and CK8/18/19 + / Vimentin and Twist -); B-D. hybrids CTCs (EpCAM and CK8/18/19 + / Vimentin and Twist +); and E. mesenchymal CTCs (EpCAM and CK8/18/19 - / Vimentin and Twist +).
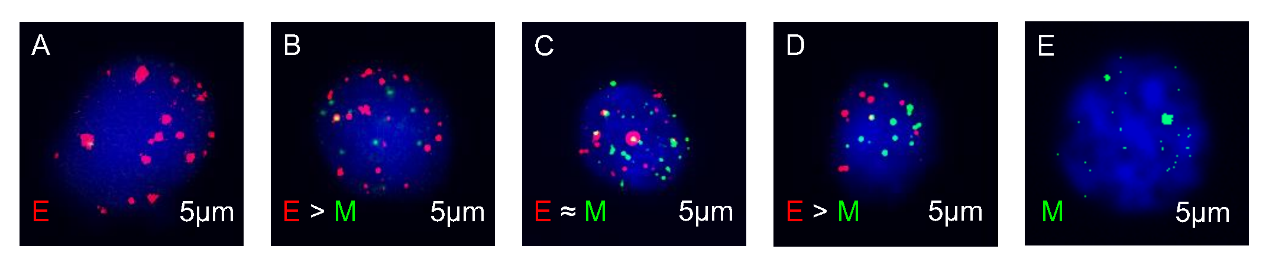

Supplement: Supplementary file 1 [file get_supplementary_file.php]
